# Supplementary material for: The pharmacokinetics and pharmacodynamics of fentanyl administered via transdermal patch in horses
Source: PubMed Central journal article supplement (PMC10987731; doi:10.3389/fpain.2024.1373759), 2024-03-20
Supplement: Datasheet1.pdf [file Datasheet1.pdf]

Supplementary Figures:

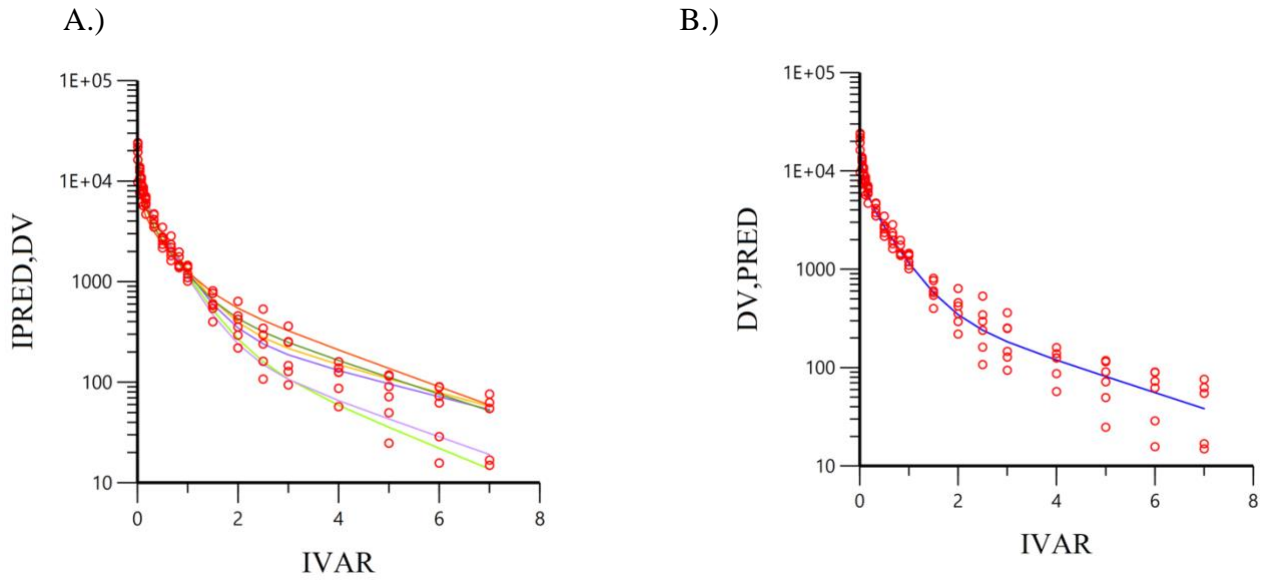

**Supplementary Figure 1.** (A) Plot of dependent variable (DV; concentrations) and individual prediction (IPRED) vs independent variable (IVAR; time) (B) Plot of dependent variable (DV; concentrations) and population prediction (PRED) vs the independent variable (IVAR: time).

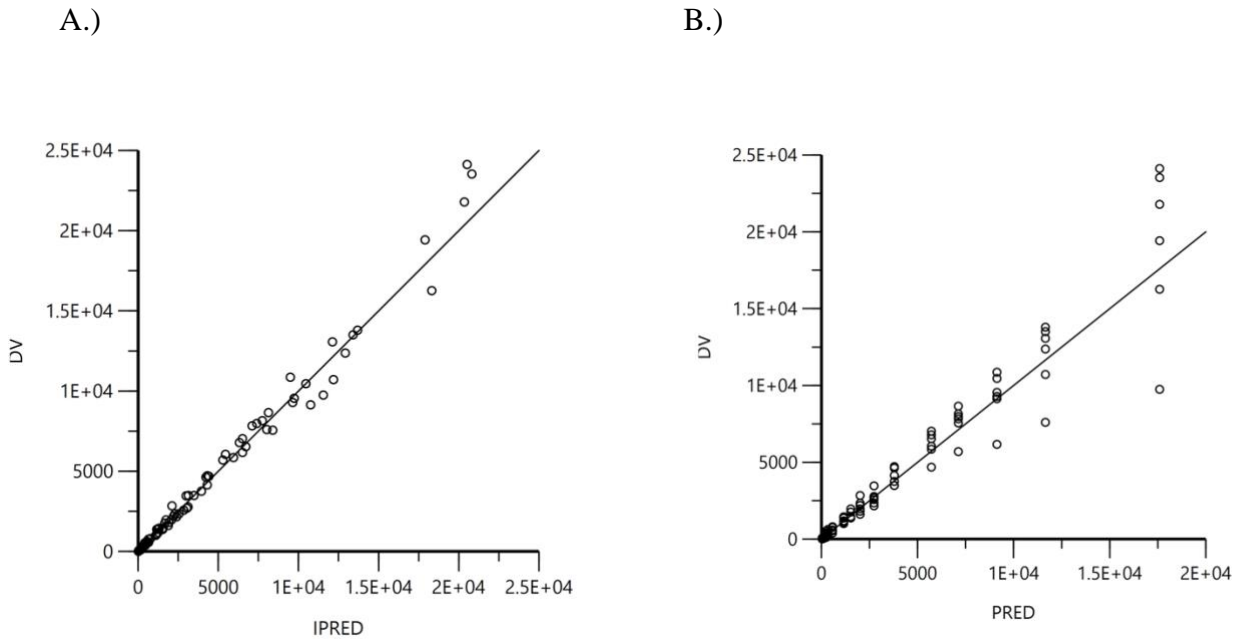

**Supplementary Figure 2.** (A) Plot of the dependent variable (DV; concentrations) versus individual predicted values (IPRED; predicted concentrations) and (B) Plot of the dependent variable (DV; concentrations) versus population predictions (PRED)
